# Supplementary material for: Missense Mutations Allow a Sequence-Blind Mutant of SpoIIIE to Successfully Translocate Chromosomes during Sporulation
Source: PubMed Central journal article supplement (PMC4744071; doi:10.1371/journal.pone.0148365), 2016-02-05
Supplement: pone.0148365.s003.pdf [file pone.0148365.s003.pdf]

# Missense Mutations Allow a Sequence-blind Mutant of SpoIIIE to Successfully Translocate Chromosomes During Sporulation

## SUPPLEMENTAL MATERIALS AND METHODS

### Strain and plasmid construction

*B. subtilis* strains used in this study are listed in Table A in S1 text and are all derivatives of the prototrophic strain PY79, unless otherwise noted [1]. Alleles were introduced to *B. subtilis* strains by transformation. Fresh streaks were used to inoculate MC medium [2], cells were grown for 4 hours at 37°C, DNA was added, and cells were grown for an additional 1 to 2 hours before plating. The *E. coli* strain DH5α was used for all cloning and for purification of soluble SpoIIIE variants. Primers used to generate new plasmids for this study are listed in Table B in S1 text. All site-directed mutagenesis was performed by Quikchange (Stratagene). Relevant portions of all generated plasmids were sequenced (Genewiz).

Because of gene conversions that restored *spoIIIE* at the native locus obtained during suppressor selection, for any strain exhibiting near wild-type sporulation efficiency, the presence of the  $\Delta spoIIIE$  allele was confirmed by PCR.

The *ycgO::{spoIIIE $\Delta$ y cat}* allele was previously used, but not described [3]. It was generated by transformation of bDR2036 (PY79 *ycgO::spc*; D.Z. Rudner, HMS) with pBB273; double crossovers were detected by marker replacement of *spc*. To construct pBB273, *spoIIIE $\Delta$ y* was amplified from PY79 genomic DNA using primers oBMB162 and oBMB242. The resulting fragment was ligated into pKM063 (double-crossover vector for

integration with chloramphenicol resistance at *ycgO*; K.A. Marquis & D.Z. Rudner, HMS) by EcoRI/BamHI.

Plasmids to integrate *spoIIIEΔγ* mutants at *ycgO* with *cat* were generated by mutagenesis of pBB273. Plasmids for integration of *spoIIIE* at *ycgO* with *cat* were generated by mutagenesis of pBB078 [4]. Plasmids for integration of alleles at *ycgO* were used to transform bDR2036, and double-crossovers were detected by marker replacement of *spc*.

The *yhdGH::{spoIIIEΔγ mls}* allele was generated by transformation of bBB445 (*PY79 yhdGH::cat*) with pBOSE2203; double-crossovers were detected by marker replacement of *cat*. To construct pBOSE2203, a fragment including *spoIIIEΔγ* was amplified from bBB388 genomic DNA using oBMB162 and oBMB242, and the fragment was ligated into pBB279 (double-crossover vector for integration with *mls*-resistance at *yhdGH*; [5]) by EcoRI/BamHI. The promoter and coding sequences for *spoIIIEΔγ* in this construct are identical to those in pBB273, used to make the *ycgO::{spoIIIEΔγ cat}* allele.

Several new strains were generated for *spoIIIEΔγ* suppressor selection. The codon for P492 in *spoIIIEΔγ* was mutated from ccg to cct by mutagenesis of pBB273 and the resulting plasmid was used to create BOSE2254. BOSE2254 was then transformed with *ΔspoIIIE::neo* from bDR1066 to generate BOSE2282, *ΔspoIIIE::spc* from PL412 [6] to generate BOSE2425, and *ΔspoIIIE::mls* from bMG007 to generate BOSE2427. The extents of the *ΔspoIIIE::neo* and *ΔspoIIIE::spc* deletions (S1 Fig) were determined by PCR of bDR1066 and PL412 genomic DNA and sequencing of the PCR products.

bDR1066 (D.Z. Rudner, HMS) was made by crossing a partial replacement of *spoIIIE* with *aphA-3* [7] into PY79 twice.

bMG007 was made by transforming PY79 with pMG008, a plasmid for integration of a mls-resistance marker by double crossover at *spoIIIE*. The double crossover was verified by PCR. pMG008 was generated by inserting upstream (oBMB284+oBMB285; EagI/SalI) and downstream (oBMB286+oBMB287; EcoRI/XbaI) *spoIIIE*-flanking sequences from PY79 into pKM074 [5] on either side of *cat*. The *cat* gene was then replaced with an mls-resistance gene from pKM084 (K.A. Marquis & D.Z. Rudner, HMS) using BamHI/SalI.

Strains for the cfp/yfp microscopy assay were made by transforming bBB115 (*ycgO::tet ΔspoIIIE::spc yycR::{PspollIQ-yfp phleo} pelB::{PspollIQ-cfp kan}*) with the indicated *ycgO* allele.

The *ΔsftA::spc* allele originated from SB1150, which we obtained from the BGSC [8]. This allele was crossed into PY79 twice to generate BOSE2074, and genomic DNA from the resulting strain was used for subsequent strain construction.

Plasmids for purification of soluble, His-tagged versions of SpoIIIEΔγ from *E. coli* were made by mutagenesis of pMB041. pMB041 was previously used to purify a soluble form of SpoIIIEΔγ but was not described [3]. pMB041 was made by using divergent primers (oMB165, oMB166) to PCR from template pJB103 [9], ligating together the resulting fragments, and transforming DH5α *E. coli* with the products.

## References

1. Youngman P, Perkins JB, Losick R. Construction of a cloning site near one end of Tn917 into which foreign DNA may be inserted without affecting transposition in *Bacillus subtilis* or expression of the transposon-borne *erm* gene. *Plasmid*. 1984;12(1):1-9. PubMed PMID: 6093169.
2. Kunst F, Msadek T, Rapoport G. Signal-Transduction Network Controlling Degradative Enzyme-Synthesis and Competence in *Bacillus-Subtilis*. In: Piggot P, Moran C, Youngman P, editors. *Regulation of Bacterial Differentiation*. Washington, D.C.: American Society for Microbiology; 1994. p. 1-20.
3. Besprozvannaya M, Pivorunas VL, Feldman Z, Burton BM. SpoIIIE protein achieves directional DNA translocation through allosteric regulation of ATPase activity by an accessory domain. *The Journal of biological chemistry*. 2013;288(40):28962-74. doi: 10.1074/jbc.M113.484055. PubMed PMID: 23974211; PubMed Central PMCID: PMC3789994.
4. Burton BM, Marquis KA, Sullivan NL, Rapoport TA, Rudner DZ. The ATPase SpoIIIE transports DNA across fused septal membranes during sporulation in *Bacillus subtilis*. *Cell*. 2007;131(7):1301-12. Epub 2007/12/28. doi: S0092-8674(07)01413-4 [pii] 10.1016/j.cell.2007.11.009. PubMed PMID: 18160039; PubMed Central PMCID: PMC2913279.
5. Bernard R, Marquis KA, Rudner DZ. Nucleoid occlusion prevents cell division during replication fork arrest in *Bacillus subtilis*. *Mol Microbiol*. 2010;78(4):866-82. doi: 10.1111/j.1365-2958.2010.07369.x. PubMed PMID: 20807205; PubMed Central PMCID: PMC2978284.
6. Pogliano K, Hofmeister AE, Losick R. Disappearance of the sigma E transcription factor from the forespore and the SpoIIIE phosphatase from the mother cell contributes to establishment of cell-specific gene expression during sporulation in *Bacillus subtilis*. *J Bacteriol*. 1997;179(10):3331-41. Epub 1997/05/01. PubMed PMID: 9150232; PubMed Central PMCID: PMC179115.
7. Wu LJ, Errington J. *Bacillus subtilis* SpoIIIE protein required for DNA segregation during asymmetric cell division. *Science*. 1994;264(5158):572-5. Epub 1994/04/22. PubMed PMID: 8160014.
8. Biller SJ, Burkholder WF. The *Bacillus subtilis* SftA (YtpS) and SpoIIIE DNA translocases play distinct roles in growing cells to ensure faithful chromosome partitioning. *Mol Microbiol*. 2009;74(4):790-809. doi: 10.1111/j.1365-2958.2009.06893.x. PubMed PMID: 19788545.
9. Bath J, Wu LJ, Errington J, Wang JC. Role of *Bacillus subtilis* SpoIIIE in DNA transport across the mother cell-forespore division septum. *Science*. 2000;290(5493):995-7. Epub 2000/11/04. doi: 8957 [pii]. PubMed PMID: 11062134.

## SUPPLEMENTAL TABLES

**Table A.** *B. subtilis* strains used in this study.

| Strain   | Genotype <sup>a,b</sup>                                                                                       | Source/reference |
|----------|---------------------------------------------------------------------------------------------------------------|------------------|
| PY79     | Prototrophic derivative of <i>B. subtilis</i> 168                                                             | [1]              |
| bBB128   | <i>ycgO::{spolIIE cat} ΔspolIIE::spc yycR::{PspolIQ-yfp phleo}</i><br><i>peIB::{PspolIQ-cfp kan}</i>          | [4]              |
| bBB388   | <i>ycgO::{spolIIEΔγ cat} ΔspolIIE::spc</i>                                                                    | This study       |
| bBB412   | <i>ycgO::{spolIIEΔγ cat} ΔspolIIE::spc yycR::{PspolIQ-yfp phleo}</i><br><i>peIB::{PspolIQ-cfp kan}</i>        | This study       |
| bDR1066  | <i>ΔspolIIE::neo</i>                                                                                          | D.Z. Rudner, HMS |
| bKM776   | <i>ycgO::{spolIIE cat} ΔspolIIE::neo</i>                                                                      | [4]              |
| BOSE2042 | <i>ycgO::{spolIIEΔγ cat} ΔspolIIE::neo</i>                                                                    | This study       |
| BOSE2120 | <i>ycgO::{spolIIEΔγ(P492Q) cat} ΔspolIIE::neo</i>                                                             | This study       |
| BOSE2121 | <i>ycgO::{spolIIEΔγ(E312A) cat} ΔspolIIE::neo</i>                                                             | This study       |
| BOSE2123 | <i>ycgO::{spolIIEΔγ(T617A) cat} ΔspolIIE::neo</i>                                                             | This study       |
| BOSE2200 | <i>ycgO::{spolIIEΔγ(P492Q) cat} ΔspolIIE::spc yycR::{PspolIQ-yfp phleo}</i><br><i>peIB::{PspolIQ-cfp kan}</i> | This study       |
| BOSE2201 | <i>ycgO::{spolIIEΔγ(E312A) cat} ΔspolIIE::spc yycR::{PspolIQ-yfp phleo}</i><br><i>peIB::{PspolIQ-cfp kan}</i> | This study       |
| BOSE2202 | <i>ycgO::{spolIIEΔγ(T617A) cat} ΔspolIIE::spc yycR::{PspolIQ-yfp phleo}</i><br><i>peIB::{PspolIQ-cfp kan}</i> | This study       |
| BOSE2282 | <i>ycgO::{spolIIEΔγ [P492(ccg--&gt; cct)] cat} ΔspolIIE::neo</i>                                              | This study       |
| BOSE2284 | <i>ycgO::{spolIIEΔγ(Y316D) cat} ΔspolIIE::neo</i>                                                             | This study       |
| BOSE2286 | <i>ycgO::{spolIIEΔγ(P260L) cat} ΔspolIIE::neo</i>                                                             | This study       |
| BOSE2288 | <i>ycgO::{spolIIEΔγ(A343V) cat} ΔspolIIE::neo</i>                                                             | This study       |
| BOSE2290 | <i>ycgO::{spolIIE(E312A) cat} ΔspolIIE::neo</i>                                                               | This study       |
| BOSE2292 | <i>ycgO::{spolIIE(T617A) cat} ΔspolIIE::neo</i>                                                               | This study       |

|          |                                                                                                        |            |
|----------|--------------------------------------------------------------------------------------------------------|------------|
| BOSE2294 | <i>ycgO::{\spoIIIE(P492Q) cat} ΔspoIIIE::neo</i>                                                       | This study |
| BOSE2296 | <i>ycgO::{\spoIIIE(Y316D) cat} ΔspoIIIE::neo</i>                                                       | This study |
| BOSE2298 | <i>ycgO::{\spoIIIE(P260L) cat} ΔspoIIIE::neo</i>                                                       | This study |
| BOSE2301 | <i>yhdGH::{\spoIIIEΔγ mls} ycgO::{\spoIIIEΔγ cat} ΔspoIIIE::neo</i>                                    | This study |
| BOSE2303 | <i>yhdGH::{\spoIIIEΔγ mls} ycgO::{\spoIIIEΔγ(P492Q) cat} ΔspoIIIE::neo</i>                             | This study |
| BOSE2305 | <i>yhdGH::{\spoIIIEΔγ mls} ycgO::{\spoIIIEΔγ(E312A) cat} ΔspoIIIE::neo</i>                             | This study |
| BOSE2307 | <i>yhdGH::{\spoIIIEΔγ mls} ycgO::{\spoIIIEΔγ(T617A) cat} ΔspoIIIE::neo</i>                             | This study |
| BOSE2309 | <i>yhdGH::{\spoIIIEΔγ mls} ycgO::{\spoIIIEΔγ(Y316D) cat} ΔspoIIIE::neo</i>                             | This study |
| BOSE2311 | <i>yhdGH::{\spoIIIEΔγ mls} ycgO::{\spoIIIEΔγ(P260L) cat} ΔspoIIIE::neo</i>                             | This study |
| BOSE2313 | <i>yhdGH::{\spoIIIEΔγ mls} ycgO::{\spoIIIEΔγ(A343V) cat} ΔspoIIIE::neo</i>                             | This study |
| BOSE2321 | <i>ycgO::{\spoIIIEΔγ(P319S) cat} ΔspoIIIE::neo</i>                                                     | This study |
| BOSE2323 | <i>ycgO::{\spoIIIEΔγ(E347G) cat} ΔspoIIIE::neo</i>                                                     | This study |
| BOSE2325 | <i>ycgO::{\spoIIIE(E347G) cat} ΔspoIIIE::neo</i>                                                       | This study |
| BOSE2331 | <i>ycgO::{\spoIIIEΔγ(P260L) cat} ΔspoIIIE::spc yycR::{\PspollQ-yfp phleo} pelB::{\PspollQ-cfp kan}</i> | This study |
| BOSE2332 | <i>ycgO::{\spoIIIEΔγ(A343V) cat} ΔspoIIIE::spc yycR::{\PspollQ-yfp phleo} pelB::{\PspollQ-cfp kan}</i> | This study |
| BOSE2425 | <i>ycgO::{\spoIIIEΔγ[P492(ccg--&gt; cct)] cat} ΔspoIIIE::spc</i>                                       | This study |
| BOSE2427 | <i>ycgO::{\spoIIIEΔγ[P492(ccg--&gt; cct)] cat} ΔspoIIIE::mls</i>                                       | This study |
| BOSE2486 | <i>ycgO::{\spoIIIEΔγ(E312A) cat} ΔspoIIIE::neo ΔsftA::spc</i>                                          | This study |
| BOSE2488 | <i>ycgO::{\spoIIIEΔγ(T617A) cat} ΔspoIIIE::neo ΔsftA::spc</i>                                          | This study |
| BOSE2490 | <i>ycgO::{\spoIIIEΔγ(Y316D) cat} ΔspoIIIE::neo ΔsftA::spc</i>                                          | This study |
| BOSE2492 | <i>ycgO::{\spoIIIEΔγ(P260L) cat} ΔspoIIIE::neo ΔsftA::spc</i>                                          | This study |
| BOSE2494 | <i>ycgO::{\spoIIIEΔγ(A343V) cat} ΔspoIIIE::neo ΔsftA::spc</i>                                          | This study |
| BOSE2496 | <i>ycgO::{\spoIIIEΔγ(P319S) cat} ΔspoIIIE::neo ΔsftA::spc</i>                                          | This study |

|          |                                                                          |            |
|----------|--------------------------------------------------------------------------|------------|
| BOSE2498 | <i>ycgO::{spoIIIEΔγ(E347G) cat} ΔspoIIIE::neo ΔsftA::spc</i>             | This study |
| BOSE2538 | <i>ycgO::{spoIIIEΔγ(H493Y) cat} ΔspoIIIE::neo</i>                        | This study |
| BOSE2540 | <i>ycgO::{spoIIIEΔγ(S264I) cat} ΔspoIIIE::neo</i>                        | This study |
| BOSE2935 | <i>ycgO::{spoIIIEΔγ(P492Q) cat} ΔspoIIIE::neo ΔsftA::spc</i>             | This study |
| BOSE3083 | <i>yhdGH::{spoIIIEΔγ mls} ycgO::{spoIIIEΔγ(P319S) cat} ΔspoIIIE::neo</i> | This study |
| BOSE3085 | <i>yhdGH::{spoIIIEΔγ mls} ycgO::{spoIIIEΔγ(E347G) cat} ΔspoIIIE::neo</i> | This study |
| BOSE3087 | <i>yhdGH::{spoIIIEΔγ mls} ycgO::{spoIIIEΔγ(H493Y) cat} ΔspoIIIE::neo</i> | This study |
| BOSE3089 | <i>yhdGH::{spoIIIEΔγ mls} ycgO::{spoIIIEΔγ(S264I) cat} ΔspoIIIE::neo</i> | This study |
| BOSE3091 | <i>ycgO::{spoIIIE(D586N) cat} ΔspoIIIE::neo</i>                          | This study |

---

<sup>a</sup> All strains are PY79 derivatives

<sup>b</sup> None of the listed strains are original isolates from the suppressor selection. All indicated mutations in *spoIIIEΔγ* were made as indicated in Materials and Methods. For each, site-directed mutagenesis was performed using a plasmid that was cloned in *E. coli*, sequenced, and introduced into the *B. subtilis* chromosome by double crossover at the indicated ectopic site. The resulting strains were transformed or genomic DNA was purified from them and used to transform other strains.

**Table B.** Primers used in this study.

| Primer   | Sequence (5' to 3')                                                | Purpose           |
|----------|--------------------------------------------------------------------|-------------------|
| oBMB162  | GTCAGAATTCGTCGGACAGGCAATCAAT                                       | pBB273, pBOSE2203 |
| oBMB242  | GAGGATCCTCGAGTTATTAGGAATGAGTTTCCGTCGTCTC<br>CTCAG                  | pBB273, pBOSE2203 |
| oBMB284  | GCGCGGCCGTGTTGAAGCTGGTCTTGCCATAGC                                  | pMG008            |
| oBMB285  | GCCGTCGACCTTCCGCTTCATTCCCTTTCATTT                                  | pMG008            |
| oBMB286  | CGGGAATTCGCTCTCTTCTTAATGAAGG                                       | pMG008            |
| oBMB287  | GGCTCTAGATCATCGGAATTTTGTCTATAC                                     | pMG008            |
| oBOSE639 | CCTTTACAGAGCTCGCAAATAAGGATTACGAGATGC                               | E312A             |
| oBOSE640 | GCATCTCGTAATCCTTATTTGCGAGCTCTGTAAAGG                               | E312A             |
| oBOSE641 | CCATCTTATTATTGCGGCACAGCGCCATCGG                                    | T617A             |
| oBOSE642 | CCGATGGCCGCTGTGCCGCAATAATAAGATGG                                   | T617A             |
| oBOSE643 | GTATTTTAATGCGGGCGAAACAGCATGAAGTGAAAATGA<br>TG                      | P492Q             |
| oBOSE644 | CATCATTTTCACTTCATGCTGTTTCGCCCCGATTAATAAC                           | P492Q             |
| oBOSE645 | GCTCGAAAATAAGGATGACGAGATGCCGTCCTGG                                 | Y316D             |
| oBOSE646 | CCAGTGACGGCATCTCGTCATCCTTATTTTCGAGC                                | Y316D             |
| oBOSE647 | CGCCTCTTATTCATTCAGAGCTGATTATCTCAAGCTTTTCT<br>G                     | P260L             |
| oBOSE648 | CAGAAAAGCTTGAGATAATCAGCTCTGAATGAATAAGAG<br>GCG                     | P260L             |
| oBOSE649 | CGGCCAGCAGGCTGATAAAAAGAATATTTATGAAAATGT<br>GAGAAAGCTTGAACGCACATTCC | A343V             |
| oBOSE650 | GGAATGTGCGTTCAAGCTTTCTCACATTTTCATAAATATTC<br>TTTTATCAGCCTGCTGGCCG  | A343V             |
| oBOSE651 | GTATTTTAATGCGGGCGAAACCTCATGAAGTGAAAATGA<br>TG                      | P492 (ccg to cct) |
| oBOSE652 | CATCATTTTCACTTCATGAGGTTTCGCCCCGATTAATAAC                           | P492 (ccg to cct) |
| oBOSE653 | GGATTACGAGATGTCGTCCTGGATTGCTGGC                                    | P319S             |
| oBOSE654 | GCCAGCAAATCCAGTGACGACATCTCGTAATCC                                  | P319S             |
| oBOSE655 | GCGAGAAAAGCTTGGACGCACATCCAAAGCTTTGG                                | E347G             |
| oBOSE656 | CCAAAGCTTTGGAATGTGCGTCCAAGCTTTCTCGC                                | E347G             |
| oBOSE660 | CTGCTCCTCCTATGACCTTTACAAAGCTCGAAAATAAGG                            | E310K             |
| oBOSE661 | CCTTATTTTCGAGCTTTGTAAAGGTCATAGGAGGAGCAG                            | E310K             |
| oBOSE702 | GCGGGCGAAACCGTATGAAGTGAAAATGATGATG                                 | H493Y             |
| oBOSE703 | CATCATCATTTTCACTTCATACGGTTTCGCCCCG                                 | H493Y             |
| oBOSE704 | GAGCCGATTATCTCAATCTTTTCTGATCGTAATGAAGAGG                           | S264I             |
| oBOSE705 | CCTCTTCATTACGATCAGAAAAGATTGAGATAATCGGCTC                           | S264I             |
| oMB165   | Phos-CAGGTCACCACCACCACCAC                                          | pMB041            |
| oMB166   | Phos-GAGTTTCCGTCGTCTCCTCAGGAATCATTCTTCTTG                          | pMB041            |



**Table C.** Suppressor selection summary

| <i>spolIIIΔγ, ΔspolIII::spc<sup>a</sup></i> |                      |                           | <i>spolIIIΔγ(P492 ccg--&gt;cct), ΔspolIII:neo<sup>b</sup></i> |                      |                           | <i>spolIIIΔγ(P492 ccg--&gt;cct), ΔspolIII:spc<sup>c</sup></i>           |                      |                           |
|---------------------------------------------|----------------------|---------------------------|---------------------------------------------------------------|----------------------|---------------------------|-------------------------------------------------------------------------|----------------------|---------------------------|
| perp. cult. <sup>e</sup>                    | outcome <sup>f</sup> | rescue round <sup>g</sup> | perp. cult. <sup>e</sup>                                      | outcome <sup>f</sup> | rescue round <sup>g</sup> | perp. cult. <sup>e</sup>                                                | outcome <sup>f</sup> | rescue round <sup>g</sup> |
| 1                                           | Y316D                | 4                         | 1                                                             | Y316S                | 3                         | 1                                                                       | P319S                | 12                        |
| 2                                           | extragenic           | 19                        | 2                                                             | P319S                | 3                         | 2                                                                       | D586N                | 25                        |
| 3                                           | E310K                | 21                        | 3                                                             | conversion           | 3                         | 3                                                                       | extragenic           | 25                        |
| 4                                           | P492Q                | 13                        | 4                                                             | A343V                | 13                        | 4                                                                       | E310K                | 6                         |
| 5                                           | P492Q                | 18                        | 5                                                             | rearranged           | 8                         | 5                                                                       | E312K                | 15                        |
| 6-1                                         | extragenic           | 21                        | 6                                                             | A343V                | 13                        | 6                                                                       | H493Y                | 6                         |
| 6-2                                         | extragenic           | 21                        | 7                                                             | unknown              | 42                        | 7                                                                       | E312K                | 6                         |
| 7                                           | extragenic           | 14                        | 8                                                             | conversion           | 4                         | 8                                                                       | extragenic           | 25                        |
| 8                                           | conversion           | 4                         | 9                                                             | A343V                | 4                         | 9                                                                       | E347G                | 15                        |
| 9                                           | conversion           | 4                         | 10                                                            | conversion           | 10                        | 10                                                                      | S264I                | 15                        |
| 10                                          | P319S                | 18                        | 11                                                            | unknown              | 35                        | <i>spolIIIΔγ(P492 ccg--&gt;cct), ΔspolIII:mls<sup>d</sup></i>           |                      |                           |
| 11                                          | P492Q                | 11                        | 12                                                            | conversion           | 8                         | perp. cult. <sup>e</sup> outcome <sup>f</sup> rescue round <sup>g</sup> |                      |                           |
| 12-1                                        | E347G                | 18                        | 13                                                            | conversion           | 10                        | 1                                                                       | A343V                | 12                        |
| 12-2                                        | extragenic           | 18                        | 14                                                            | Y316C                | 3                         | 2                                                                       | E312K                | 15                        |
| 13                                          | extragenic           | 14                        | 15                                                            | conversion           | 8                         | 3                                                                       | S264I                | 28                        |
| 14                                          | no rescue            | (>21)                     | 16                                                            | conversion           | 7                         | 4                                                                       | unknown              | 15                        |
| 15                                          | P260L                | 9                         | 17                                                            | lost                 | 5                         | 5                                                                       | A343V                | 12                        |
| 16                                          | A343V                | 5                         | 18                                                            | conversion           | 13                        | 6                                                                       | Y316C                | 9                         |
| 17                                          | extragenic           | 16                        | 19                                                            | A343V                | 3                         | 7                                                                       | E310K                | 12                        |
| 18                                          | P492Q                | 4                         | 20                                                            | extragenic           | 8                         | 8                                                                       | P319R                | 6                         |
| 19                                          | A343V                | 13                        |                                                               |                      |                           | 9                                                                       | no rescue            | (>28)                     |
| 20                                          | extragenic           | 18                        |                                                               |                      |                           | 10                                                                      | E312K                | 28                        |
| 21                                          | E312A                | 4                         |                                                               |                      |                           |                                                                         |                      |                           |
| 22                                          | P492Q                | 4                         |                                                               |                      |                           |                                                                         |                      |                           |
| 23                                          | T617A                | 4                         |                                                               |                      |                           |                                                                         |                      |                           |

<sup>a</sup> abbreviated genotype of bBB388

<sup>b</sup> abbreviated genotype of BOSE2282

<sup>c</sup> abbreviated genotype of BOSE2425

<sup>d</sup> abbreviated genotype of BOSE2427

<sup>e</sup> perpetuated culture, term for one culture cycled repeatedly through sporulation, heat-kill, and germination

<sup>f</sup> for intragenic suppressors, mutation is specified; “extragenic”: suppressor isolate had wild-type *spolIIIΔγ* sequence; “conversion”: denotes “gene conversion”, where  $\Delta spolIII E$  marker was lost and wild-type sporulation efficiency recovered; “no rescue”: perpetuated culture never exhibited increased sporulation efficiency; “rearranged”: rescue involved a rearrangement of sequences such that the strain harbored *ycgO::{\Delta spolIII EΔγ::neo cat} and spolIII E[P492(ccg--> cct)]*; “unknown”: sequence of *spolIII EΔγ* from isolates exhibiting rescue was not determined; “lost”: the perpetuated culture went missing during passaging

<sup>g</sup> approximate round of passaging during which culture exhibited rescue and individual isolates were recovered; for perpetuated cultures that never exhibited recovery (“no rescue”), the last round of passaging is indicated

**Table D.** Residues in SpoIIIE/FtsK family members corresponding to mutated residues in SpoIIIEΔy suppressors<sup>a</sup>

|      | P319          | A343           | E347           | P492           | H493           | D586           | T617          |
|------|---------------|----------------|----------------|----------------|----------------|----------------|---------------|
| A    |               | 39.3<br>(61.7) |                | 17.9<br>(4.3)  | 6.0<br>(10.6)  |                |               |
| D    |               |                |                |                | 28.6<br>(14.9) | 98.8<br>(92.9) | (4.3)         |
| E    |               |                | 79.8<br>(80.9) |                | 29.8<br>(63.8) |                |               |
| G    |               | 2.4<br>(2.1)   |                |                |                |                |               |
| H    |               |                |                | 2.4            |                |                |               |
| I    |               | 1.2            | 2.4<br>(6.4)   |                |                |                |               |
| K    |               | 8.3<br>(12.8)  | 2.4            |                | 4.8<br>(4.3)   |                |               |
| L    |               |                | 6.0<br>(2.1)   |                |                |                |               |
| M    |               |                | 1.2            |                |                |                |               |
| N    |               |                | (2.1)          |                | 7.1            | 1.2            |               |
| P    | 100<br>(85.1) |                |                | 79.8<br>(89.4) |                |                |               |
| Q    |               |                | (4.3)          |                | 3.6<br>(2.1)   |                |               |
| R    |               |                | (2.1)          | (2.1)          | 14.3           |                |               |
| S    |               | 48.8<br>(21.3) | 1.2            |                | 4.8            |                |               |
| T    |               | (2.1)          | 1.2            |                | 1.2            | (7.1)          | 100<br>(95.7) |
| V    |               |                | 6.0<br>(2.1)   |                |                |                |               |
| Y    |               |                |                |                |                |                |               |
| gaps | (14.9)        |                |                | (4.3)          | (4.3)          |                |               |

<sup>a</sup>Percentages of different residues at each position in other family members, that have (no parentheses) or lack (parentheses) y domains. Mutations found in suppressor isolates are highlighted with dark grey.
